# Supplementary material
Source: Springer Nature journal article supplement (https://www.springermedizin.de/resource/supplementary/12875_2010_471_MOESM1_ESM.pdf/9434676)
Supplement: MOESM1 [file 9434676]

# Predicted & observed 5 year risk by model tenth

## Chronic Kidney Disease in the THIN database

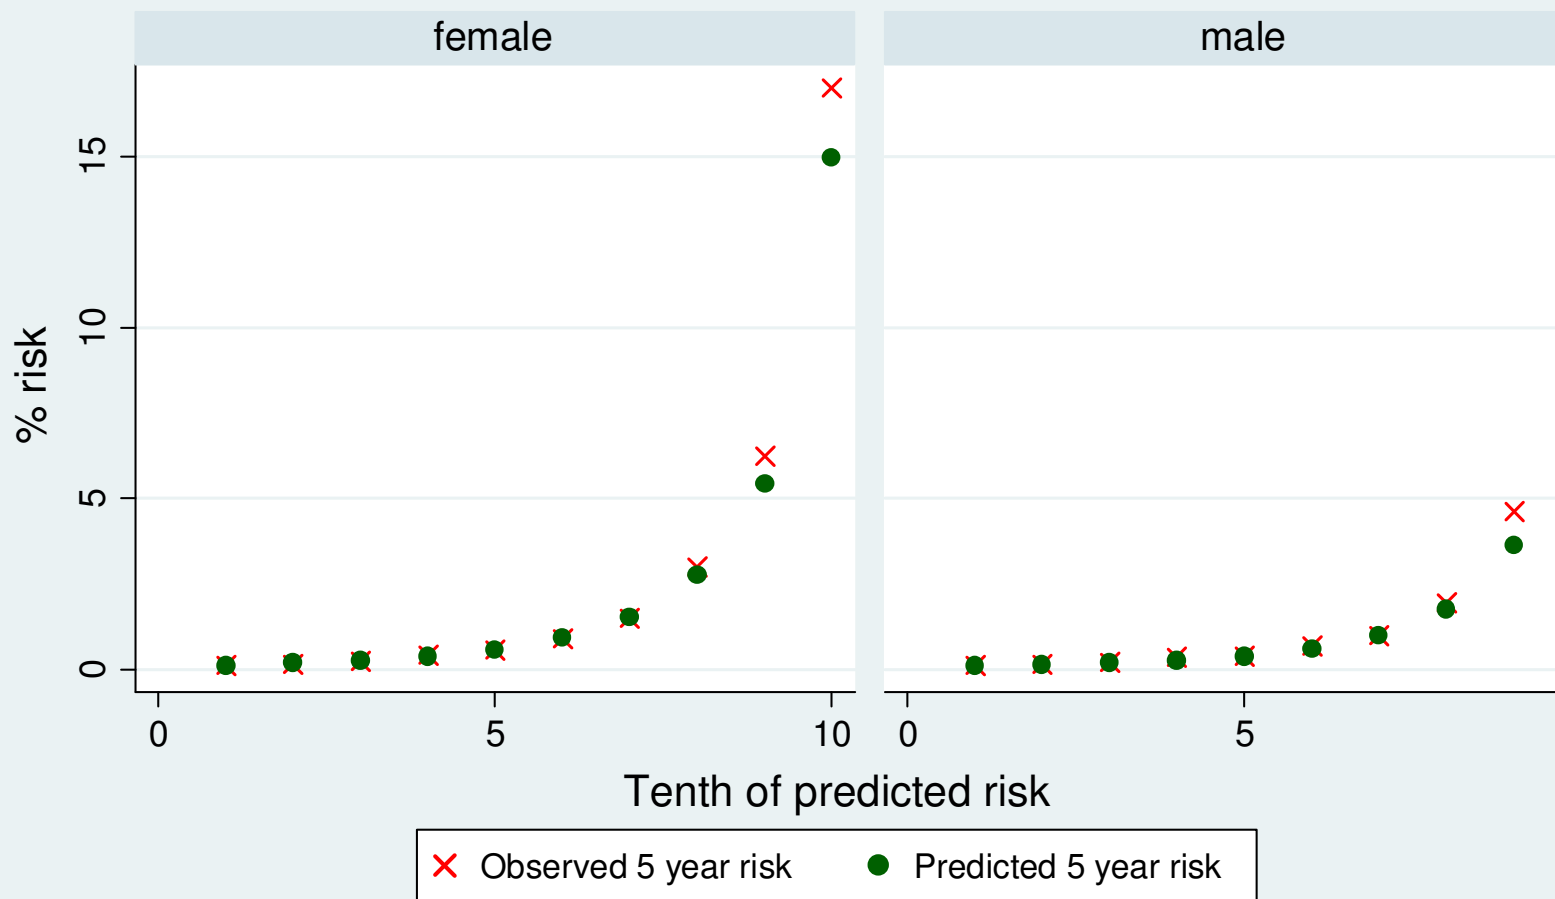

Data source: THIN database

(c) ClinRisk 2010 all rights reserved

**Notes on understanding calibration curves:** The graphs show that the red and the blue curves are very close which shows the close correspondence between observed and predicted risk at each level (tenth) of predicted risk.
